# Supplementary material for: Fabrication of honeycomb-structured composite material of Pr2O3, Co3O4, and graphene on nickel foam for high-stability supercapacitors
Source: Royal Society of Chemistry journal article supplement (doi:10.1039/d2nj05192c), 2022-12-02
Supplement: d2nj05192c1.pdf [file d2nj05192c1.pdf]

## Supporting Information

### Fabrication of honeycomb-structured composite material of Pr<sub>2</sub>O<sub>3</sub>, Co<sub>3</sub>O<sub>4</sub>, and graphene on nickel foam for high-stability supercapacitor

Yulin Xin,<sup>a</sup> Shixiang Lu,<sup>\*a</sup> Wenguo Xu,<sup>\*a</sup> and Shasha Wang,<sup>a</sup>

<sup>a</sup>School of Chemistry and Chemical Engineering, Beijing Institute of Technology, Beijing 100081, China

<sup>\*</sup>Corresponding author, E-mail: [shixianglu@bit.edu.cn](mailto:shixianglu@bit.edu.cn) (Shixiang Lu); [xuwg60@bit.edu.cn](mailto:xuwg60@bit.edu.cn) (Wenguo Xu)

#### S1 Preparation of Pr<sub>2</sub>O<sub>3</sub>/Co<sub>3</sub>O<sub>4</sub>/NF composite electrode

0.85 mmol of cobalt acetate and praseodymium acetate, and 1 mmol of urea were dissolved in 15 mL of deionized water and stirred magnetically for 80 min to form a homogeneous solution. A portion of the above-treated NF and mixed solution was transferred to a 25 mL autoclave lined with PTFE and reacted for 12 h in an oven at 180 °C. After being washed with ethanol and deionized water, the Pr<sub>2</sub>O<sub>3</sub>/Co<sub>3</sub>O<sub>4</sub>/NF precursor was dried in an oven at 90 °C for 4 h. After 2 h of annealing in a muffle furnace at 300 °C, the Pr<sub>2</sub>O<sub>3</sub>/Co<sub>3</sub>O<sub>4</sub>/NF composite electrode was produced.

#### S2 Preparation of Pr<sub>2</sub>O<sub>3</sub>/rGO/NF composite electrode

In 7.5 mL of deionized water, 0.85 mmol of praseodymium acetate and 1 mmol urea were dissolved and magnetically agitated for 40 min to generate a homogenous solution. Then, 7.5 mL of homogenous graphene oxide suspension with a concentration of 2 mg·mL<sup>-1</sup> was added. Continue magnetic stirring for 40 min to ensure thorough mixing. The processed NF and combined solution were placed in an autoclave with polytetrafluoroethylene and reacted for 12 h in an oven at 180 °C. The precursor was cleaned with ethanol and deionized water before being dried in a 90 °C oven for 4 h. Finally, the Pr<sub>2</sub>O<sub>3</sub>/rGO/NF composite electrode was created by annealing it for 2 h in a muffle furnace at 300 °C.

#### S3 Preparation of Co<sub>3</sub>O<sub>4</sub>/rGO/NF composite electrode

0.85 mmol of cobalt acetate and 1 mmol urea were diluted in 7.5 mL deionized water and magnetically agitated for 40 min to generate a homogenous solution. Then 7.5 mL of homogenous graphene oxide suspension with a concentration of 2 mg·mL<sup>-1</sup> was added. Continue magnetic stirring for 40 min to thoroughly combine. A portion of the above-mentioned treated NF and the combined solution were placed to an autoclave with polytetrafluoroethylene and reacted in an oven at 180 °C for 12 h. The precursor was washed with ethanol and deionized water before being dried in an oven at 90 °C for 4 h. The Co<sub>3</sub>O<sub>4</sub>/rGO/NF composite electrode was formed after 2 h of annealing in a muffle furnace at 300 °C.

#### S4 Preparation of rGO/NF composite electrode

Added 7.5 mL of deionized water and 7.5 mL of graphene oxide suspension with a concentration of 2 mg·mL<sup>-1</sup> to the beaker. Mixed well with magnetic stirring for 80 min. A portion of the above-mentioned treated NF and the combined solution were placed in an autoclave with polytetrafluoroethylene and reacted in an oven at 180 °C for 12 h. The precursor was placed in a crucible and annealed at 300 °C for 2 h before being dried in a 90 °C oven for 4 h. The rGO/NF composite electrode was formed after 2 h of annealing in a muffle furnace at 300 °C.

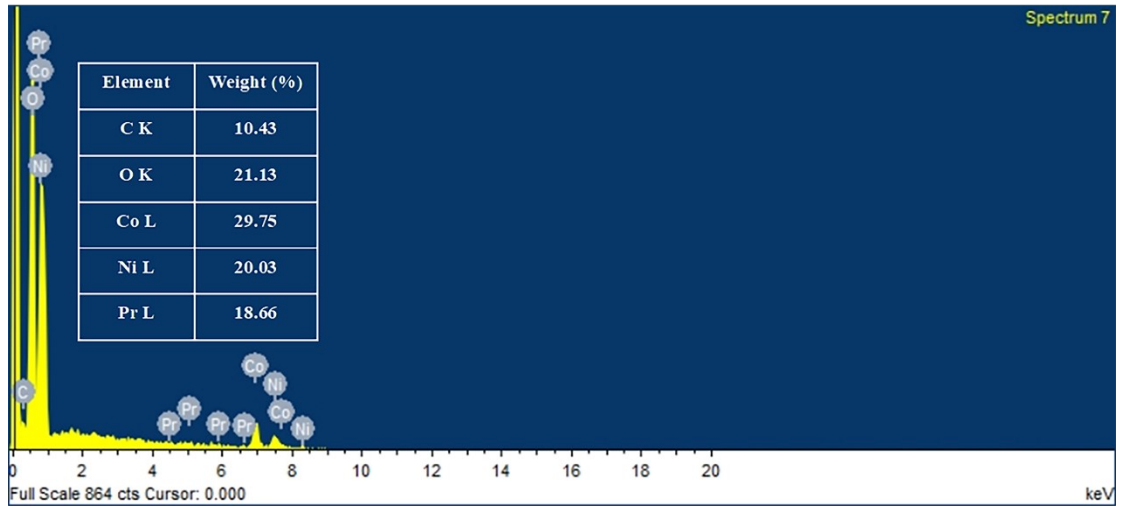

Fig. S5 EDS of Pr<sub>2</sub>O<sub>3</sub>/Co<sub>3</sub>O<sub>4</sub>/rGO/NF composite electrode.

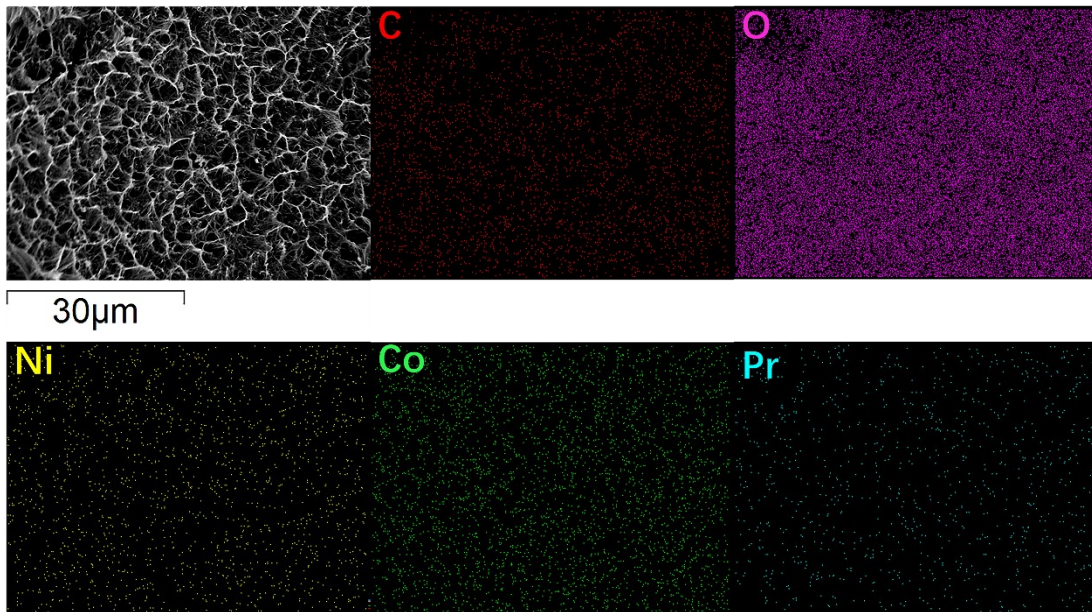

Fig. S6 EDS elemental mapping images of Pr<sub>2</sub>O<sub>3</sub>/Co<sub>3</sub>O<sub>4</sub>/rGO/NF composite electrode.
